# Supplementary material for: Understanding vapor phase growth of hexagonal boron nitride
Source: Royal Society of Chemistry journal article supplement (doi:10.1039/d4nr02624a), 2024-01-01
Supplement: d4nr02624a1.pdf [file d4nr02624a1.pdf]

## Supporting Information

### Characterization Methods

#### *Fourier-Transformed Infrared Spectroscopy*

The spectra were recorded using a Spectrum 400 (*Perkin Elmer*) in the range of 500-4000  $\text{cm}^{-1}$  with four scans per sample, using a data interval of 1 nm and a scan speed of 266.75 nm/min.

#### *Scanning Microscope Spectroscopy*

The SEM measurements were performed on a 300 VP RISE field emission scanning microscope (FESEM) from *Zeiss Sigma*.

#### *Raman Spectroscopy*

The Raman spectra were recorded using a Lab Ram HR 800 spectrometer (Horiba Ltd.) using a green line  $\text{Ar}^+$  ion laser (514.5 nm) in the range of 900-2000  $\text{cm}^{-1}$ .

#### *X-Ray Photoelectron Spectroscopy*

The XPS spectra were measured with an ESCA M-Probe spectrometer (*Surface Science Instruments*). A monochromatic Al  $\text{K}_{\alpha}$  x-ray source (1486.6 eV,  $\lambda = 8.33 \text{ \AA}$ ) was used and the spectra were recorded in the range of 0-1000 eV at ultra-high vacuum ( $10^{-9}$  mbar). The survey spectra were recorded using the following parameters: detector pass energy: 158.3 eV; step size: 0.5 eV; dwell time: 125 ms; data accumulation: seven scans per sample. High resolution spectra were recorded using the following parameters: detector pass energy: 55.2 eV; step size: 0.05 eV; dwell time: 175 ms; data accumulation: ten scans per sample (carbon) and 25 (other elements) were chosen, respectively. The data was evaluated using CASA XPS software suite (*Casa Software Ltd.*).

#### *UV-Vis Measurement*

The UV-vis spectra were recorded using a LAMBDA 950 spectrometer (*Perkin Elmer*). The samples were measured in the transmission mode compared to a reference consisting of the same substrate material.

#### *Atomic Force Microscopy*

The measurement of the sample thickness and surface structure of the BN layers were carried out on a XE-100 (*Park System*) atomic force microscope in a non-contact mode.

#### *Transmission Electron Microscopy*

High resolution transmission electron microscopy (HR-TEM) was carried out using a JEOL JEM 2200 FS equipped with UHR pole piece at 200 kV and an JEOL EDX detector. The thin

films were transferred onto Quantifoil® Multi A10 copper grids (200 mesh). Data analysis was carried out using ImageJ software suite and dedicated macros.

### Contact Angle Measurement

The contact angles were measured with the drop shape analysis system DSA 100 (KRÜSS GmbH). A defined amount (1  $\mu\text{L}$ ) of pure solvent (water, diiodomethane or ethylene glycol) is placed on the surface and the angle of the tangent between the baseline (substrate surface) and the solvent droplet is measured; each measurement is repeated on 3 independent positions and the resulting mean value is reported.

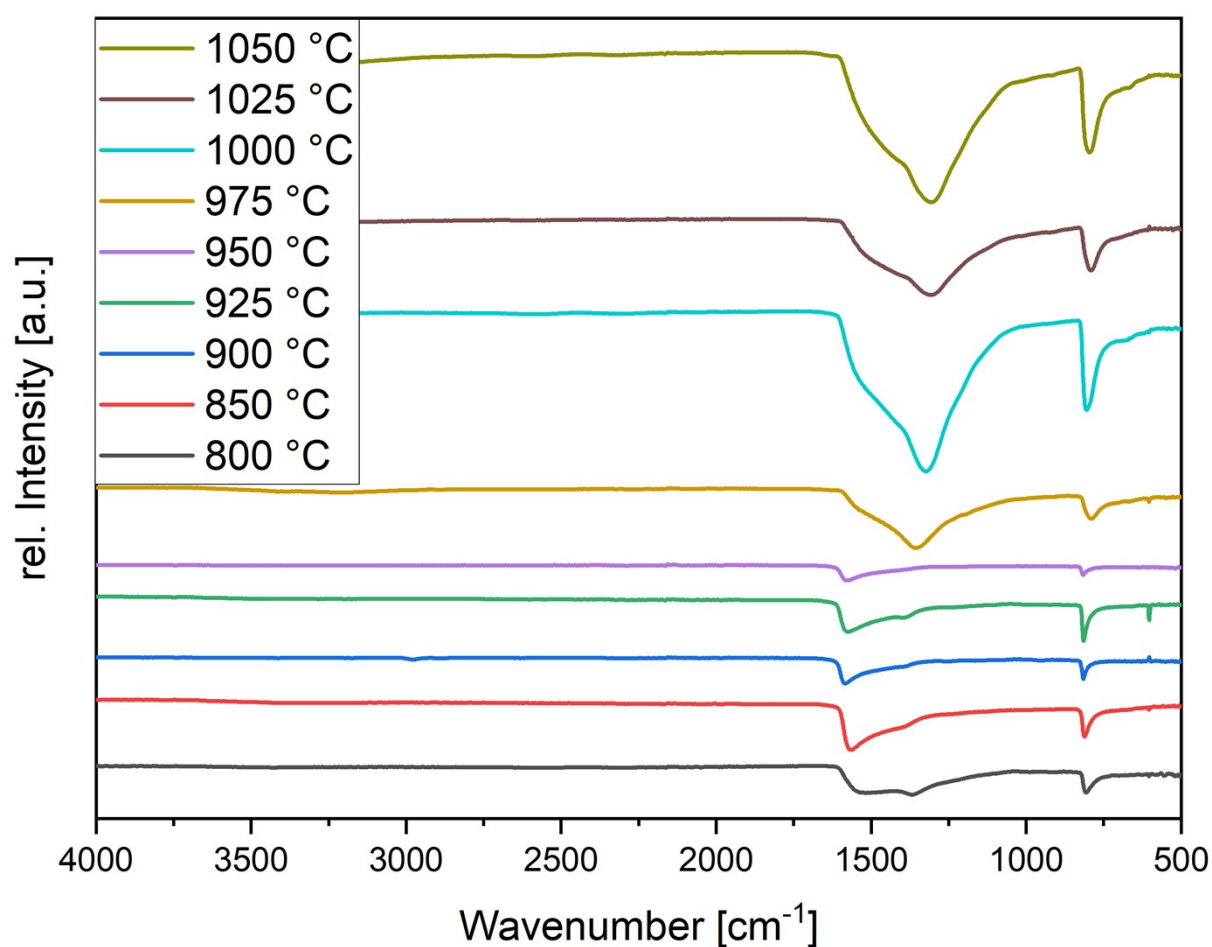

SI-Figure 1: ATR-FT-IR measurements of boron nitride depositions using ammonia borane depending on the temperature in the range of 800-1050 °C.

SI-Table 1: Position and intensity of the FT-IR vibrations of SI-Figure 1 depending on the temperature.

| Deposition Temperature [°C] | B-N-B out-of plane Vibration [cm <sup>-1</sup> ] | B-N in-plane Vibration [cm <sup>-1</sup> ] | N-H bond Vibration [cm <sup>-1</sup> ] |
|-----------------------------|--------------------------------------------------|--------------------------------------------|----------------------------------------|
| 800                         | 805 [87%]                                        | 1370 [86%]                                 | 1515 [86]                              |
| 850                         | 811 [80%]                                        | -                                          | 1566 [74%]                             |
| 900                         | 817 [89%]                                        | -                                          | 1584 [87%]                             |
| 925                         | 817 [78%]                                        | 1394 [88%]                                 | 1573 [82%]                             |
| 950                         | 815 [94%]                                        | -                                          | 1578 [91%]                             |
| 975                         | 788 [83%]                                        | 1357 [70%]                                 | -                                      |
| 1000                        | 804 [55%]                                        | 1325 [27%]                                 | -                                      |
| 1025                        | 789 [77%]                                        | 1307 [66%]                                 | -                                      |
| 1050                        | 795 [54%]                                        | 1307 [32%]                                 | -                                      |

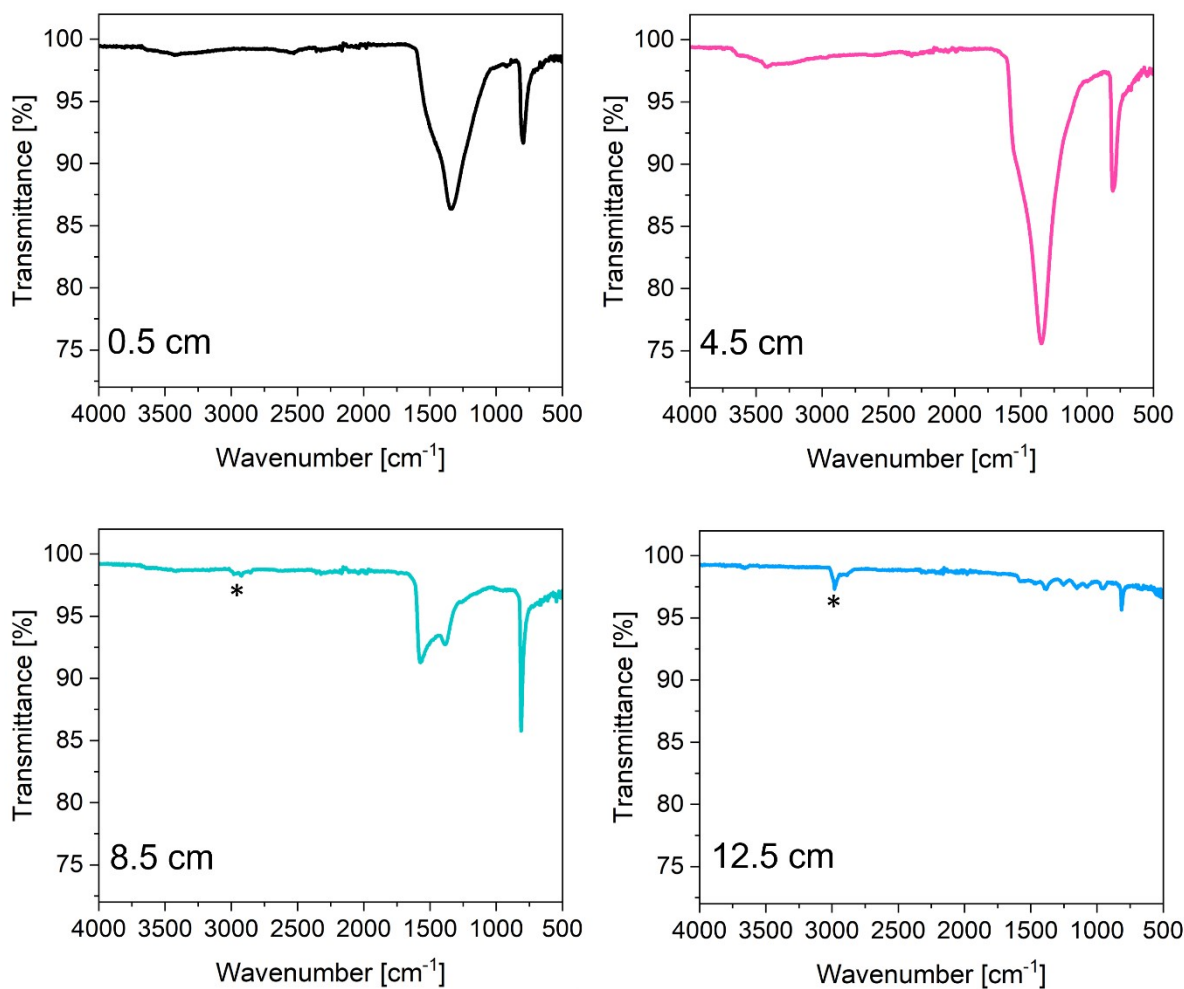

SI-Figure 2: Magnification of the FT-IR spectra of Figure 3. Deposited *h*BN thin films in hot-wall CVD using ammonia borane as precursor.

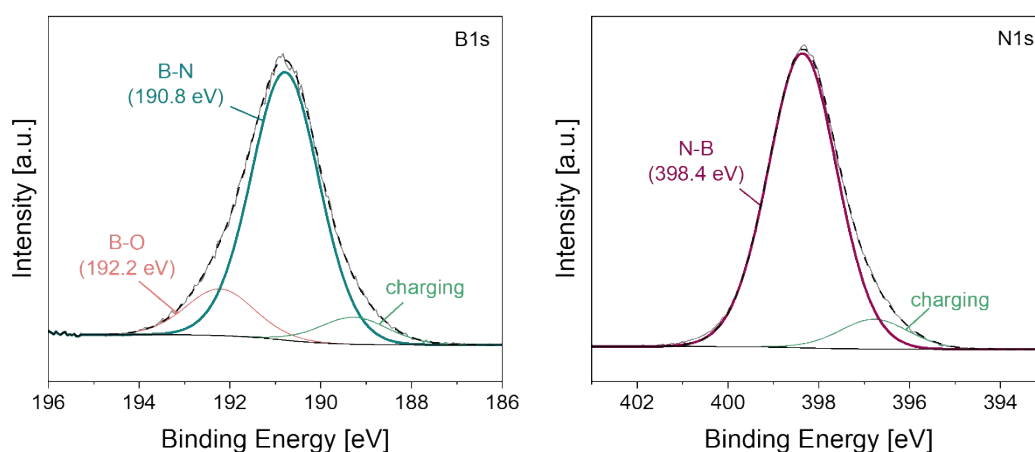

SI-Figure 3: Magnification of the high resolution XPS spectra of Figure 4. Deposited *h*BN films in a hot-wall CVD using ammonia as precursor.

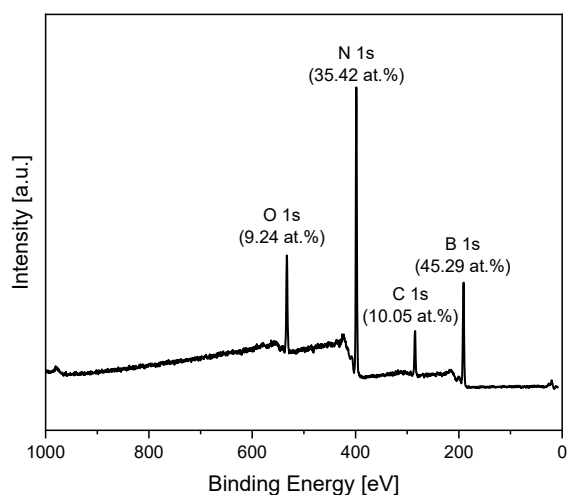

SI-Figure 4: Survey XPS spectra of hBN thin films deposited via hot-wall CVD using ammonia borane as precursor.

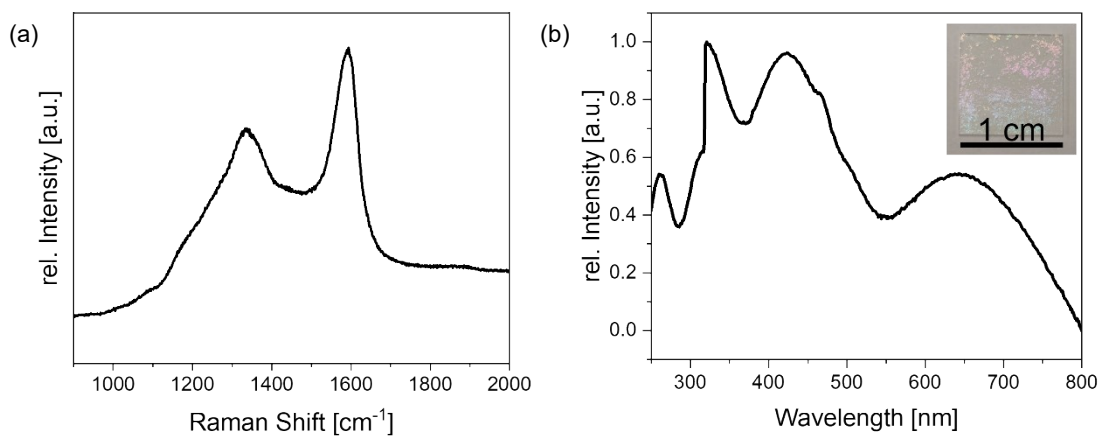

SI-Figure 5: Magnification of the (a) Raman and (b) UV-vis spectra of Figure 4.

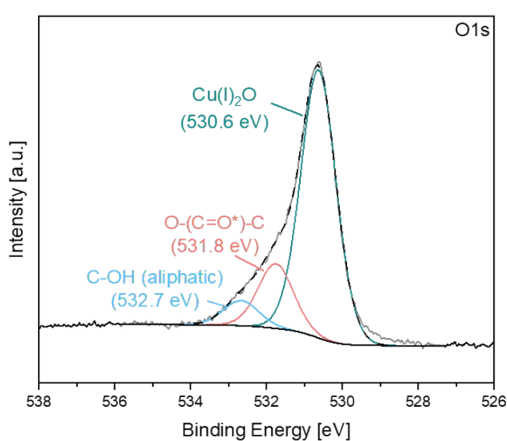

SI-Figure 6: High resolution spectra of the O1s core level XPS spectra of hBN thin films deposited via hot-wall CVD using borazine as precursor.

(a)

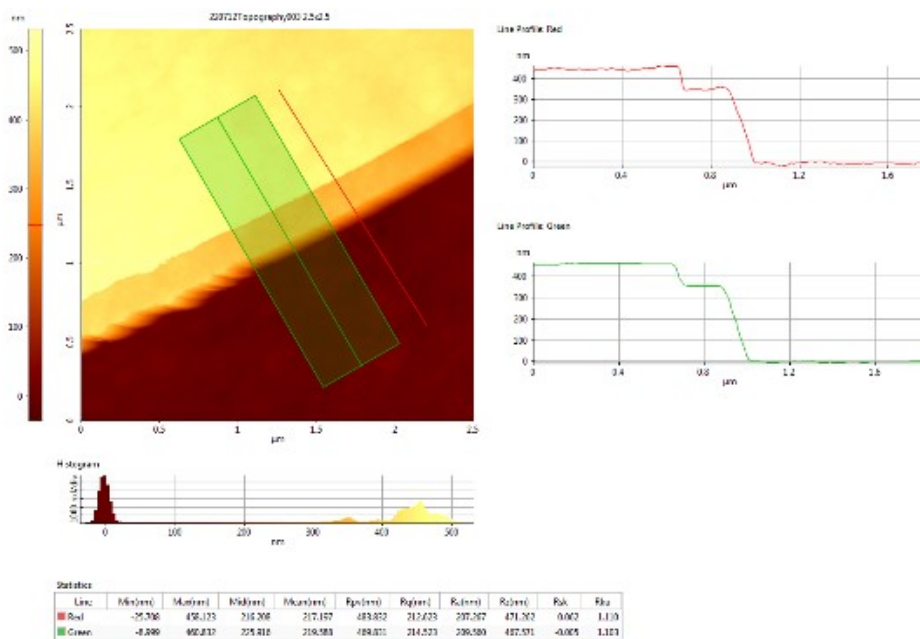

(b)

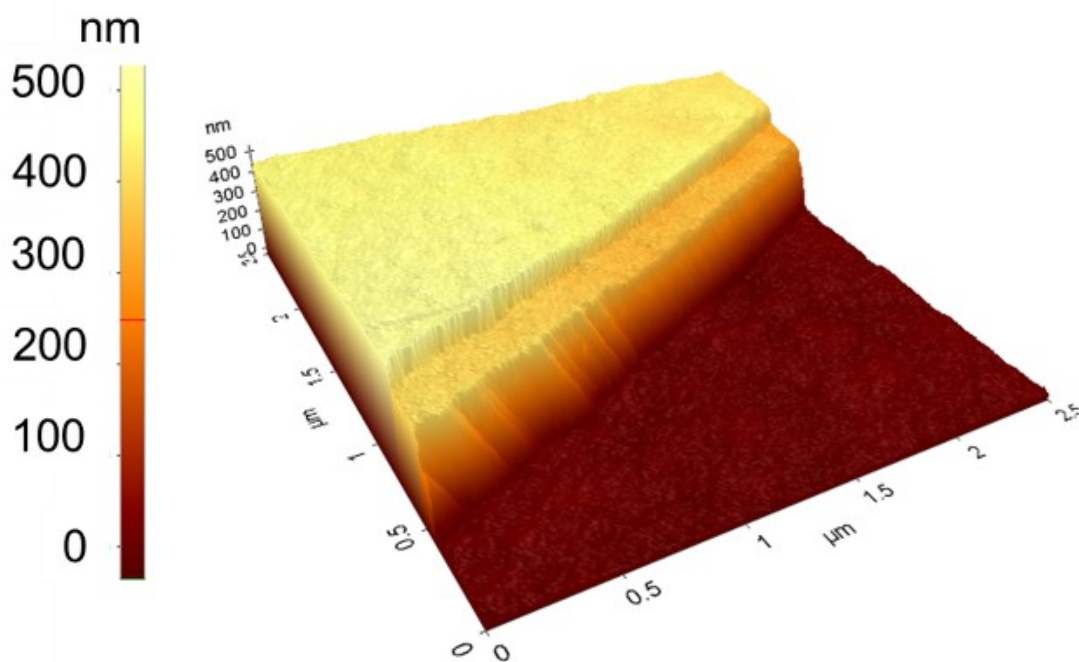

SI-Figure 7: (a) Details of the AFM measurement of *h*BN films deposited in a cold-wall CVD system with magnifications of the insets of (b) Figure 7.

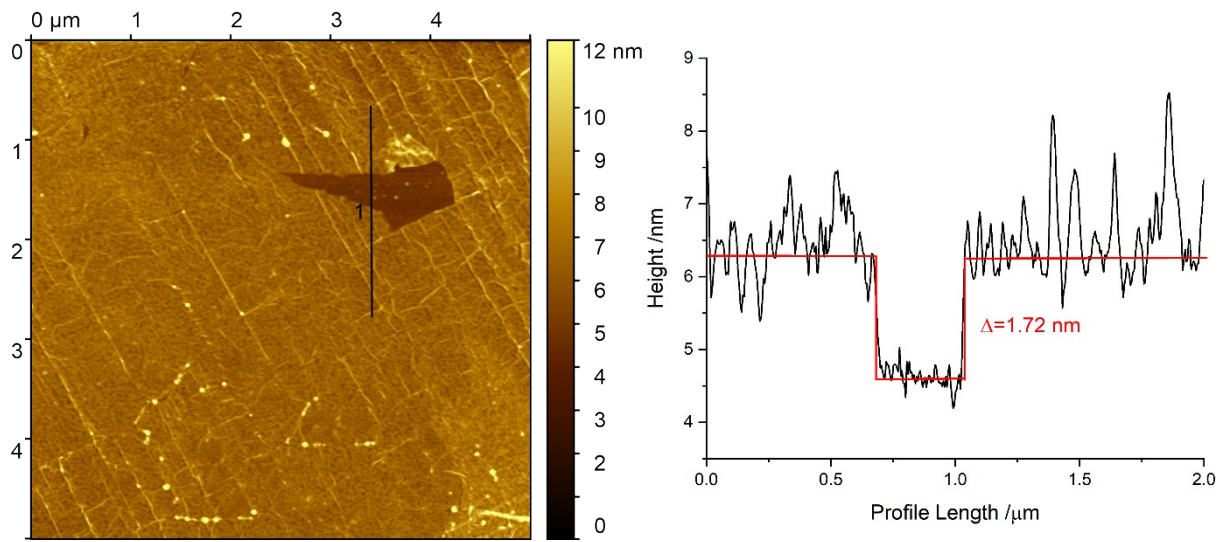

*SI-Figure 8:* Magnification of the AFM image of Figure 7. *h*BN thin film deposited by hot-wall CVD using borazine as precursor and transferred on SiO<sub>2</sub>.

## Determination of Surface Free Energy (SFE) according to the Fowkes relationship

The surface free energy (SFE) of a material can be determined by measuring the contact angles between the surface and solvents with known dispersive and non-dispersive components of their surface tension (SI-Table 2, SI-Figure 9).

SI-Table 2: Total surface tension as a sum of a dispersive and polar component for selected solvents used in this study. <sup>[1]</sup>

| Liquid                                          | Total surface tension / mN m <sup>-1</sup> | Dispersive component /mN m <sup>-1</sup> | Polar component /mN m <sup>-1</sup> |
|-------------------------------------------------|--------------------------------------------|------------------------------------------|-------------------------------------|
| Diiodomethane (CH <sub>2</sub> I <sub>2</sub> ) | 50,8                                       | 50,8                                     | 0,0                                 |
| Water (H <sub>2</sub> O)                        | 72,8                                       | 26,3                                     | 46,6                                |
| Ethylene glycol (EG)                            | 48,0                                       | 29,8                                     | 18,2                                |

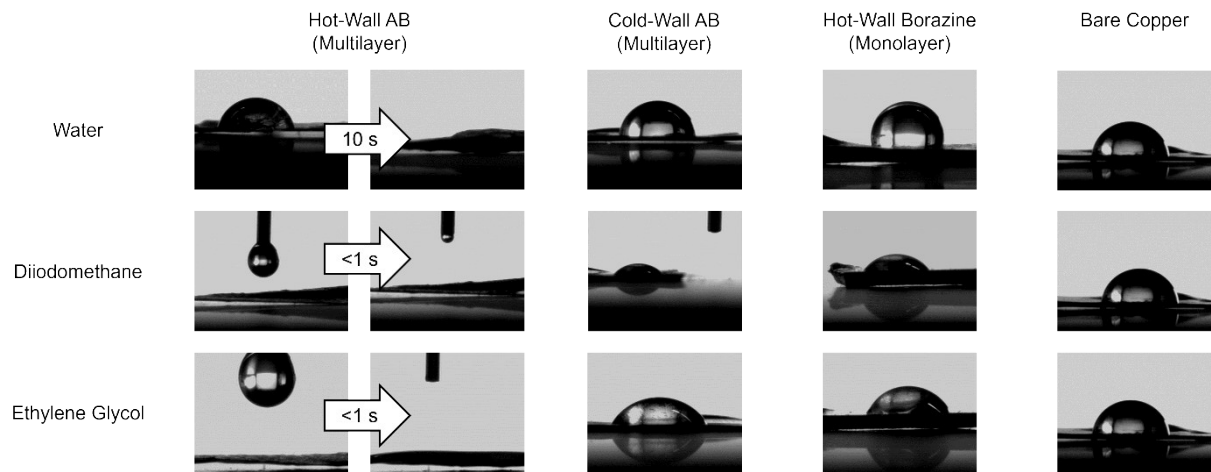

SI-Figure 9: Contact angle measurements of hBN thin films deposited by hot and cold wall CVD using ammonia borane and borazine as precursor compared to a bare copper substrate. Water, diiodomethane and ethylene glycol were used as solvents for the measurement.

Based on the fundamental relationships formulated by Fowkes <sup>[2]</sup>, the contact angle ( $\theta$ ) of a solvent with a surface tension only consisting of a disperse components  $\sigma_l^D$  (CH<sub>2</sub>I<sub>2</sub>), the disperse component of the surface energy  $\sigma_s^D$  can be obtained (eq.1). In a subsequent step, the polar component  $\sigma_s^P$  can be derived from the contact angle ( $\theta$ ) of a second solvent (H<sub>2</sub>O) with known polar ( $\sigma_l^P$ ) and disperse ( $\sigma_l^D$ ) components of the surface tension (eq. 2).

$$\cos\theta = 2\sqrt{\sigma_s^D} \cdot \frac{1}{\sqrt{\sigma_l^D}} - 1 \quad (\text{eq. 1})$$

$$2\sqrt{\sigma_l^P} \cdot \sqrt{\sigma_s^P} = \sigma_l(\cos\theta + 1) - 2\sqrt{\sigma_s^D \cdot \sigma_l^D} \quad (\text{eq. 2})$$



*SI-Table 3:* Summary of contact angles with different solvents and resulting surface energies according to the Fowkes relationship. Wherever possible, the contact angle was measured at three independent positions at each sample and the mean value and corresponding standard deviation is reported. Due to the inability to determine the quasi-non-existent contact angles between the hBN coating derived from ammonia borane in a hot-wall setup with CH<sub>2</sub>I<sub>2</sub> and EG the dispersive components can only be estimated, but due to the low contact angles observed (<5°) the error can be estimated to be less than 1% for the dispersive component.

| Precursor<br>(Process)               | Contact Angle /° |                                |            | Surface Energy /mJ m-2) |                    |                   |
|--------------------------------------|------------------|--------------------------------|------------|-------------------------|--------------------|-------------------|
|                                      | H <sub>2</sub> O | CH <sub>2</sub> I <sub>2</sub> | EG         | Dispersive<br>component | Polar<br>component | Total             |
| <b>Reference</b><br>(Cu Substrate)   | 76.0 ± 2.0       | 75.3 ± 0.7                     | 74.7 ± 3.6 | 20.0 ± 0.4              | 5.5 ± 0.8          | <b>25.9 ± 1.3</b> |
| <b>Ammonia borane</b><br>(Cold-Wall) | 85.1 ± 3.5       | 53.0 ± 1.3                     | 64.8 ± 2.2 | 32.6 ± 0.8              | 2.3 ± 1.0          | <b>35.6 ± 1.7</b> |
| <b>Ammonia borane</b><br>(Hot-Wall)  | 33.3 ± 0.9       | <5°                            | <5°        | 50.0 ± 0.4              | 30.3 ± 0.5         | <b>80.7 ± 0.9</b> |
| <b>Borazine</b><br>(Hot Wall)        | 111.1 ± 1.0      | 51.2 ± 2.1                     | 57.8 ± 2.7 | 33.6 ± 1.2              | 0.8 ± 0.2          | <b>35.5 ± 1.3</b> |

- [1] A. Zdziennicka, J. Krawczyk, K. Szymczyk, B. Jańczuk, *Colloids and Surfaces A: Physicochemical and Engineering Aspects* **2017**, 529,864-875.
- [2] F. M. Fowkes, *Industrial & Engineering Chemistry* **1964**, 56,40-52.
